# Supplementary material
Source: publisher site journal article supplement (https://www.dovepress.com/article/600261)
Supplement: Supplementary file 1 [file 600261%20Supplementary%20table_1.docx]

**Supplemental Table S1. Mean arterial pressure, heart rate, and pulse oxygen saturation during the perinatal period.**

|  | **Lidocaine group (n=33)** | **Control group (n=33)** | **Effect size, MD**  **(95% CI) a** | ***P* value** |
| --- | --- | --- | --- | --- |
| Mean arterial pressure, mmHg |  |  |  | 0.583 b |
| Before anesthesia | 84±12 | 82±7 | 2 (-3, 7) | 0.500 |
| After anesthesia (immediately after study drug) | 74±10 | 73±11 | 1 (-4, 6) | 0.728 |
| Before intubation | 64±10 | 61±11 | 3 (-2, 8) | 0.253 |
| Immediately after intubation | 77±14 | 75±12 | 1 (-5, 8) | 0.687 |
| Immediately after CO2 pneumoperitoneum | 77±10 | 80±8 | -3 (-7, 2) | 0.232 |
| Immediately after pumping muscle relaxant | 77±10 | 80±10 | -3 (-8, 3) | 0.316 |
| Immediately after study drug infusion stop | 71±10 | 75±10 | -4 (-9, 1) | 0.136 |
| End of surgery | 75±12 | 75±10 | -0 (-6, 5) | 0.947 |
| Immediately after extubation | 83±11 | 82±12 | 1 (-5, 7) | 0.738 |
| 1 h after surgery | 83±16 | 83±10 | -0 (-7, 7) | 0.985 |
| Heart rate, bpm |  |  |  | 0.516 b |
| Before anesthesia | 81±13 | 82±11 | -1 (-7, 5) | 0.675 |
| After anesthesia (immediately after study drug) | 83±15 | 83±12 | 0 (-7, 7) | 0.917 |
| Before intubation | 85±17 | 85±17 | -1 (-9, 8) | 0.852 |
| Immediately after surgery begin | 86±16 | 86±17 | 0 (-8, 8) | 0.988 |
| Immediately after CO2 pneumoperitoneum | 75±15 | 75±12 | 1 (-6, 7) | 0.806 |
| Immediately after pumping muscle relaxant | 72±11 | 74±12 | -2 (-8, 3) | 0.423 |
| Immediately after study drug infusion stop | 64±9 | 63±7 | 1 (-4, 5) | 0.827 |
| End of surgery | 66±12 | 64±11 | 3 (-3, 8) | 0.330 |
| Immediately after extubation | 77±13 | 77±13 | -1 (-7, 6) | 0.863 |
| 1 h after surgery | 76±9 | 74±8 | 2 (-2, 6) | 0.372 |
| Pulse oxygen saturation, % |  |  |  | 0.050 b |
| Before anesthesia | 100 (99, 100) | 100 (100, 100) | 0 (0, 0) | 0.581 |
| After anesthesia (immediately after study drug) | 100 (100, 100) | 100 (100, 100) | 0 (0, 0) | 0.154 |
| Before intubation | 100 (100, 100) | 100 (100, 100) | 0 (0, 0) | 0.317 |
| Immediately after surgery begin | 100 (100, 100) | 100 (100, 100) | 0 (0, 0) | 0.317 |
| Immediately after CO2 pneumoperitoneum | 100 (100, 100) | 100 (100, 100) | 0 (0, 0) | 0.317 |
| Immediately after pumping muscle relaxant | 100 (100, 100) | 100 (100, 100) | 0 (0, 0) | 0.166 |
| Immediately after study drug infusion stop | 100 (100, 100) | 100 (100, 100) | 0 (0, 0) | 0.154 |
| End of surgery | 100 (100, 100) | 100 (100, 100) | 0 (0, 0) | 0.983 |
| Immediately after extubation | 100 (100, 100) | 100 (100, 100) | 0 (0, 0) | 0.085 |
| 1 h after surgery | 100 (99, 100) | 100 (100, 100) | 0 (0, 0) | 0.084 |

Data are mean ± SD or median (interquartile range). *P* values in bold indicate <0.05/10=0.005 after Bonferroni correction.

a MD denotes mean difference for normally distributed variables and median difference for non-normally distributed variables.

b Calculated by the generalized estimating equations for the interactive term 'group × time'.
